# Supplementary material for: Cryo-EM structures reveal high-resolution mechanism of a DNA polymerase sliding clamp loader
Source: eLife journal article supplement (doi:10.7554/elife.74175), 2022-02-18

**A**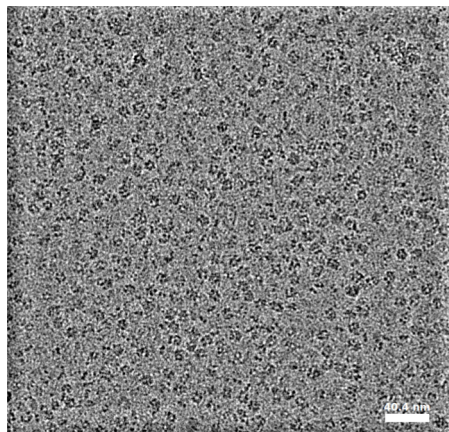**B**

6109 micrographs  
 ↓ **automatic picking**  
 954 291 particles  
 ↓  
**2D classification**  
 834 099 particles

**2D class averages**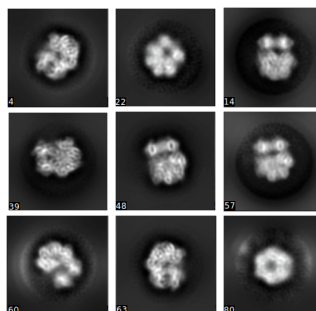**C**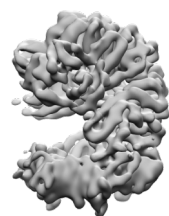**Ab initio Model****D****3D classification**

834 099 particles, 4.24 Å/pixel

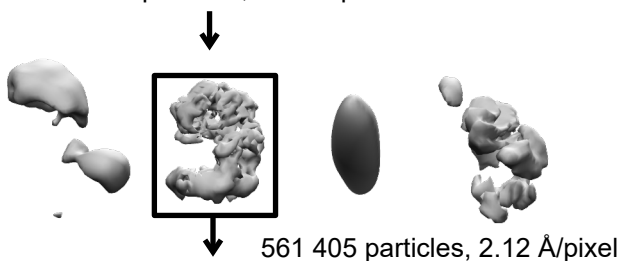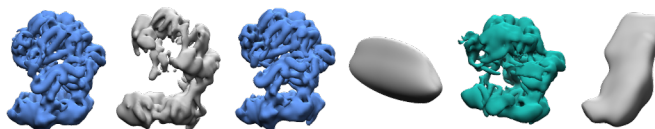

336 272 particles, 1.06 Å/pixel ↓

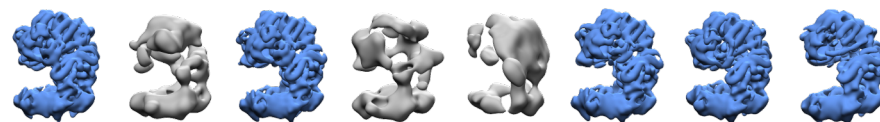

↓ 297 797 particles

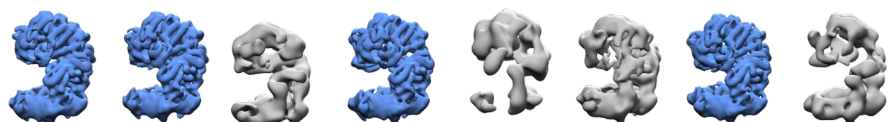**local angular search** ↓ 241 793 particles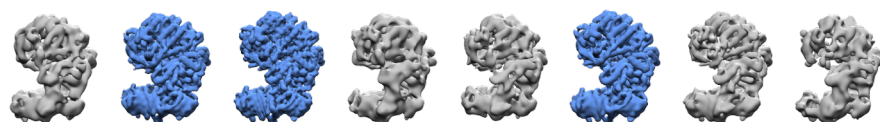↓ **refinement map sharpening**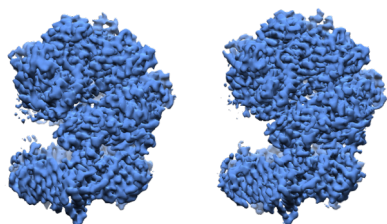

**Autoinhibited2**  
 68227 particles  
 3.9 Å

**Autoinhibited1**  
 55308 particles  
 3.8 Å

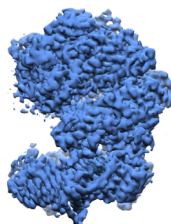

**Autoinhibited3**  
 60036 particles  
 4.0 Å

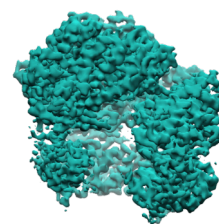

**Open1**  
 46069 particles  
 4.0 Å

↓ **refinement map sharpening**

↓ 123 200 particles, 1.06 Å/pixel

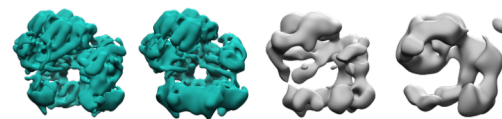

↓ 105 145 particles

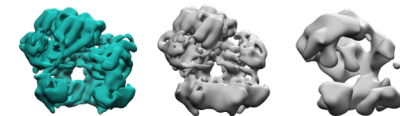

Supplement: supp [file elife_poa_e74175_Figure_1_figure_supplement_2.pdf › elife_poa_e74175_Figure_1_figure_supplement_2.pdf]
