# Supplementary material for: Cryo-EM structures reveal high-resolution mechanism of a DNA polymerase sliding clamp loader
Source: eLife journal article supplement (doi:10.7554/elife.74175), 2022-02-18

RFC

- A
- B
- C
- D
- E

## A Closed1 (color) to Open2

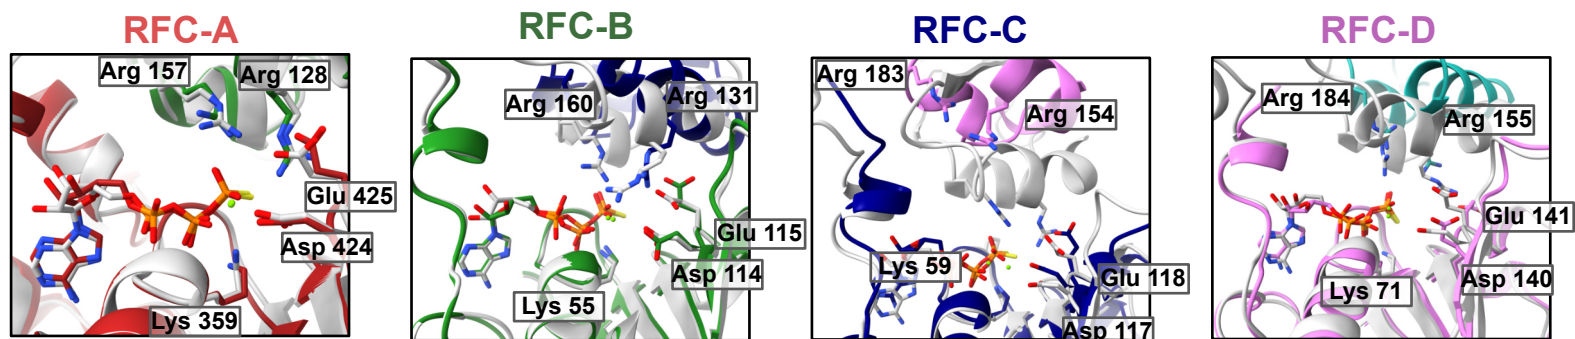

## B Open2 (color) to DNA<sup>PCNA-open</sup>

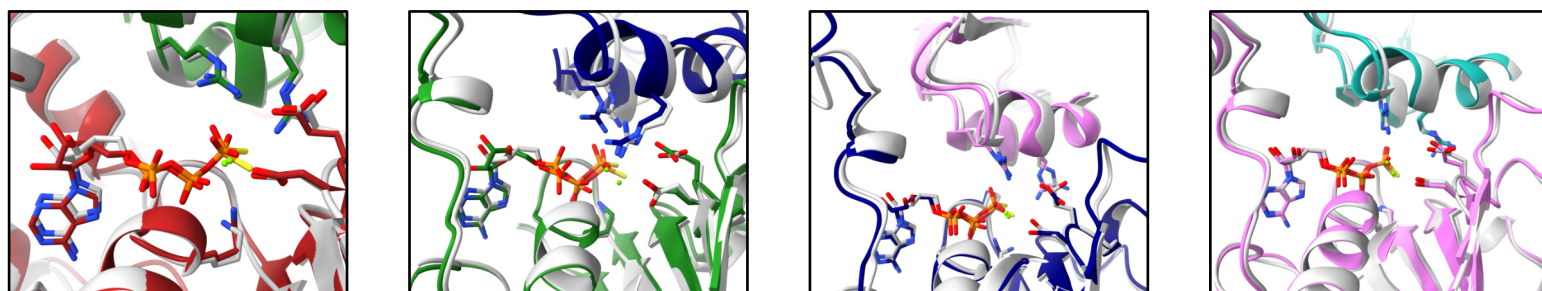

## C DNA<sup>PCNA-open</sup> (color) to DNA<sup>PCNA-closed</sup>

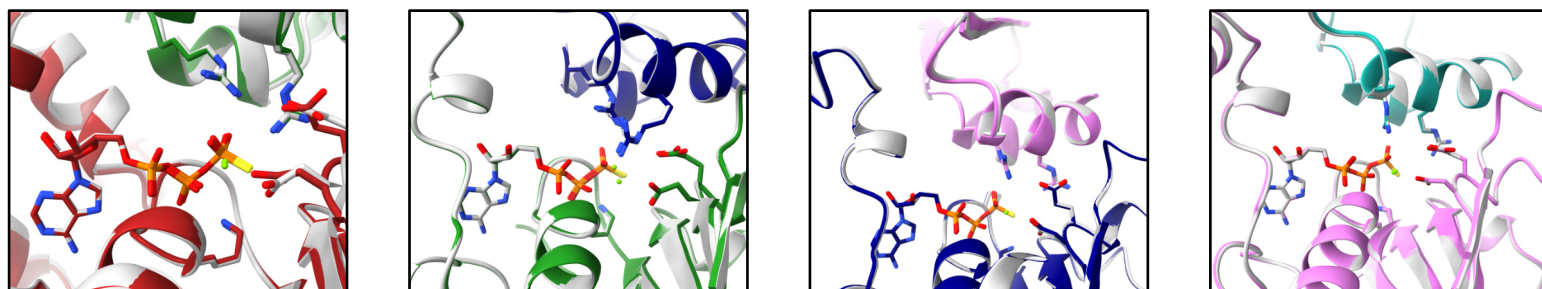

Supplement: supp [file elife_poa_e74175_Figure_5_figure_supplement_2.pdf › elife_poa_e74175_Figure_5_figure_supplement_2.pdf]
