# Supplementary material for: Cryo-EM structures reveal high-resolution mechanism of a DNA polymerase sliding clamp loader
Source: eLife journal article supplement (doi:10.7554/elife.74175), 2022-02-18
Supplement: supp [file elife_poa_e74175_Figure_6_figure_supplement_4.pdf › elife_poa_e74175_Figure_6_figure_supplement_4.pdf]

**A**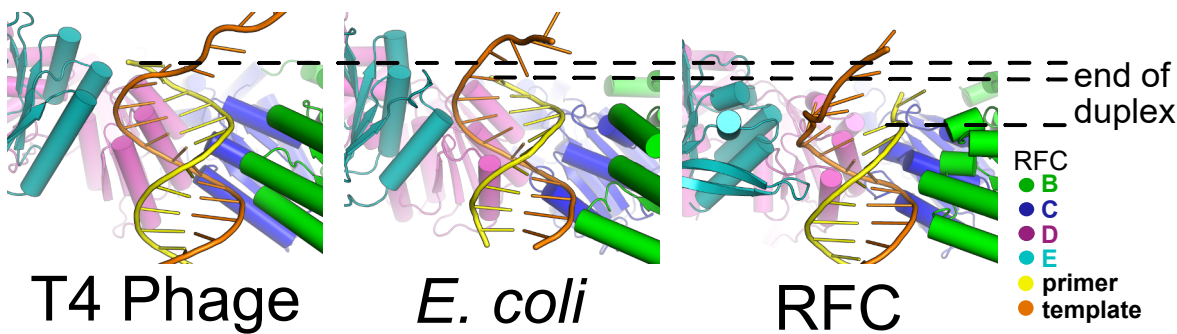**B**

| Clamp loader interactions with p/t-DNA |                                                         |                                               |                                       |
|----------------------------------------|---------------------------------------------------------|-----------------------------------------------|---------------------------------------|
|                                        | Interaction Area B, C, D, E subunits ( $\text{\AA}^2$ ) | Interaction Area A subunit ( $\text{\AA}^2$ ) | Reference                             |
| T4Phage                                | 1149                                                    | 659                                           | Kelch et al 2011                      |
| <i>E. coli</i>                         | 1100                                                    | 619                                           | Simonetta et al 2009                  |
| <i>S. cerevisiae</i>                   | 762                                                     | 1369                                          | this work, DNA <sup>PCNA-closed</sup> |
