# Supplementary material for: Cryo-EM structures reveal high-resolution mechanism of a DNA polymerase sliding clamp loader
Source: eLife journal article supplement (doi:10.7554/elife.74175), 2022-02-18

**A**

|                        |     |    |     |      |           |     |    |    |      |     |
|------------------------|-----|----|-----|------|-----------|-----|----|----|------|-----|
| <i>S. cerevisiae</i>   | YFD | DF | DFT | PI   | 591...634 | QLW | SL | LP | LHA  | 645 |
| <i>C. elegans</i>      | FF  | DY | GIM | PL   | 568...609 | GS  | WK | LL | NEQS | 620 |
| <i>D. melanogaster</i> | FF  | H  | DYS | LAPL | 714...754 | SA  | WS | LL | PTQA | 765 |
| <i>D. rerio</i>        | FF  | H  | DYS | LAPL | 876...919 | QT  | WS | LL | PTQA | 930 |
| <i>H. sapiens</i>      | FF  | H  | DYS | IAPL | 884...927 | QN  | WS | LL | PAQA | 938 |

**B**

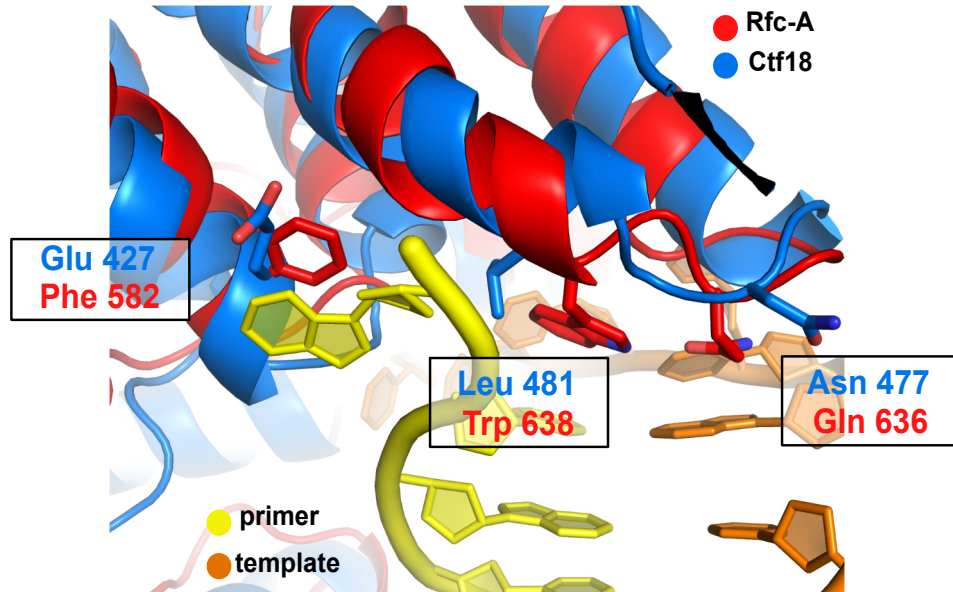

Supplement: supp [file elife_poa_e74175_Figure_6_figure_supplement_5.pdf › elife_poa_e74175_Figure_6_figure_supplement_5.pdf]
