# Supplementary material for: Cryo-EM structures reveal high-resolution mechanism of a DNA polymerase sliding clamp loader
Source: eLife journal article supplement (doi:10.7554/elife.74175), 2022-02-18
Supplement: supp [file Figure6-FigSupp1_meanstandarddev-table.xlsx]

## Sheet: Tabelle1
	replicate 1	replicate 2	replicate 3	mean	standard deviation
Vmax	0.1335	0.1223	0.1066	0.1208	0.0135126		WT
Km	7.626	7.871	11.14	8.879	1.96191		WT
Vmax	0.1344	0.1349	0.1229	0.130733	0.00678847		F582A
Km	13.08	14.41	13.79	13.76	0.665507		F582A
Vmax	0.06716	0.0625	0.05655	0.06207	0.00531805		W638G
Km	32.96	28.86	32.91	31.5767	2.35284		W638G
