# Supplementary figures and images for: Cryo-EM structures reveal high-resolution mechanism of a DNA polymerase sliding clamp loader
Source: eLife journal article supplement (doi:10.7554/elife.74175), 2022-02-18

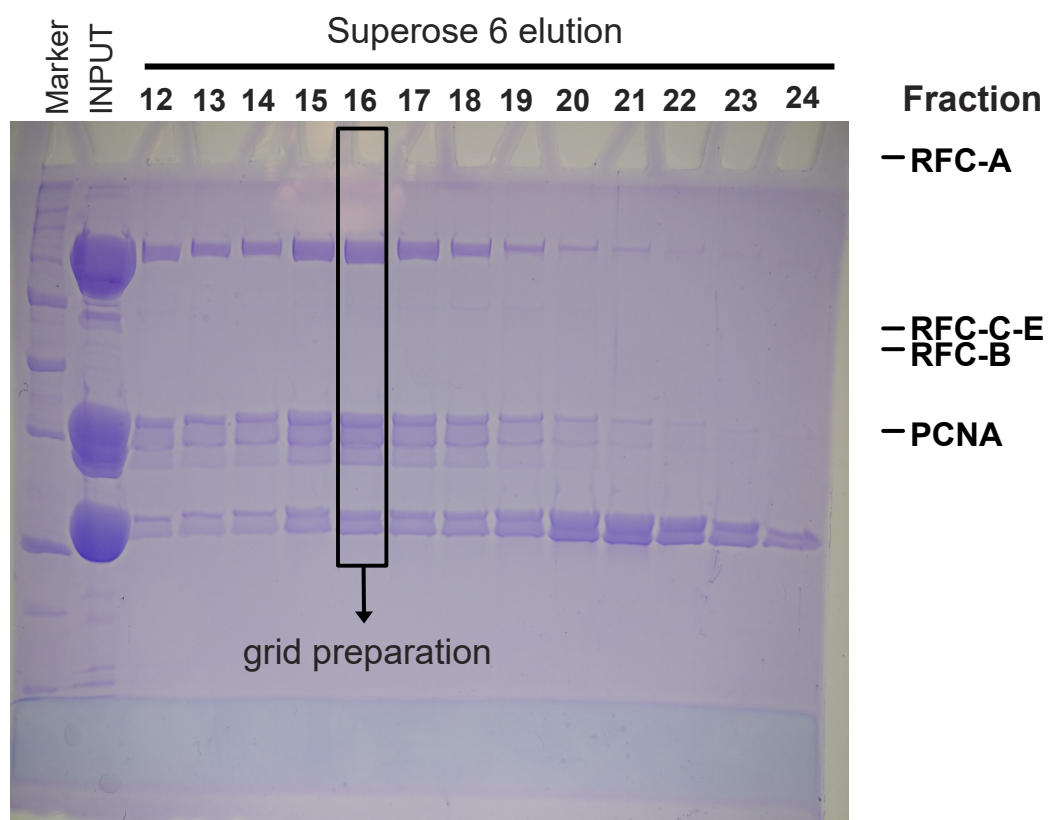

Supplement: fig1-figsupp1-data1 [file elife-74175-fig1-figsupp1-data1-v2.zip]

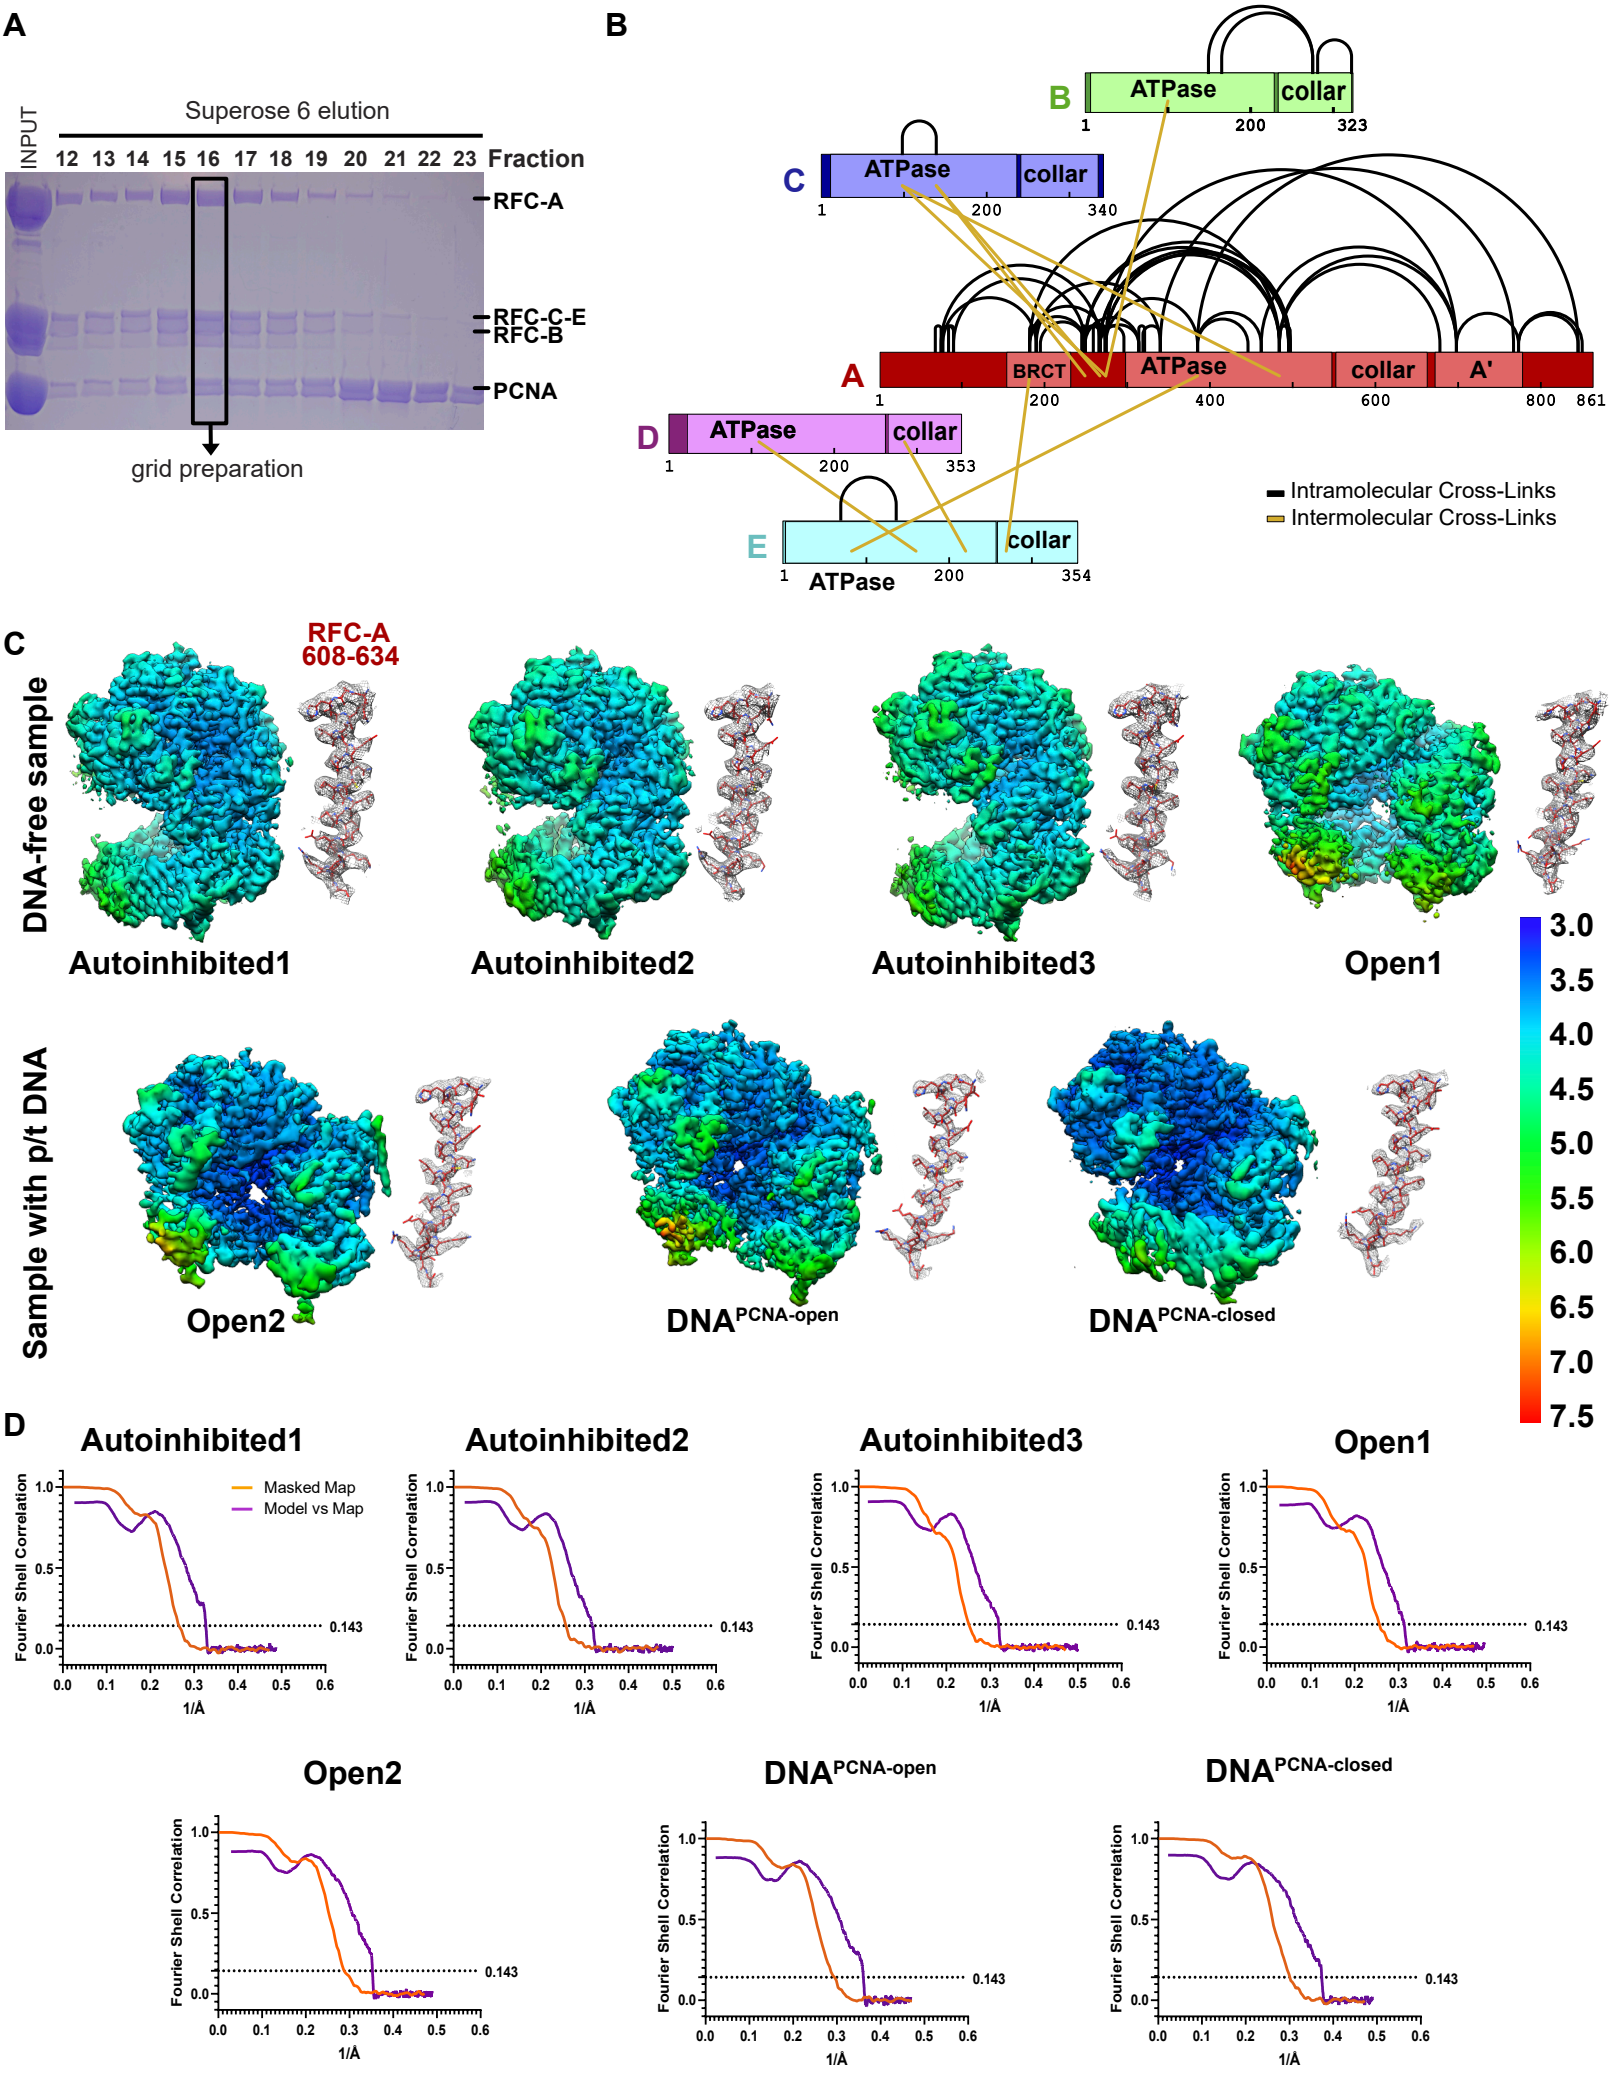

Supplement: supp [file elife_poa_e74175_Figure_1_figure_supplement_1.pdf › elife_poa_e74175_Figure_1_figure_supplement_1.pdf]

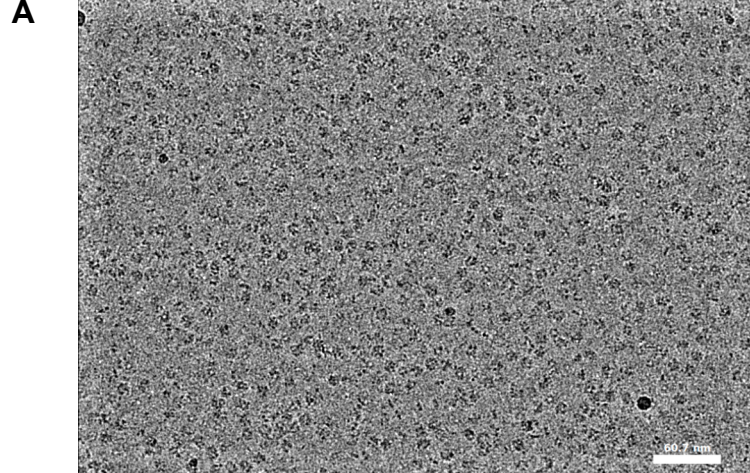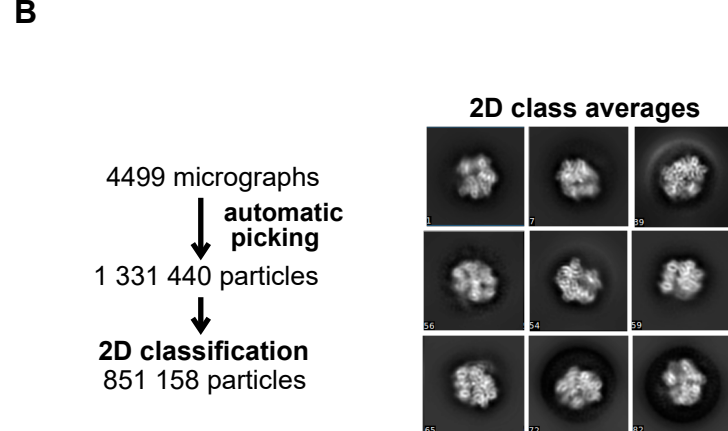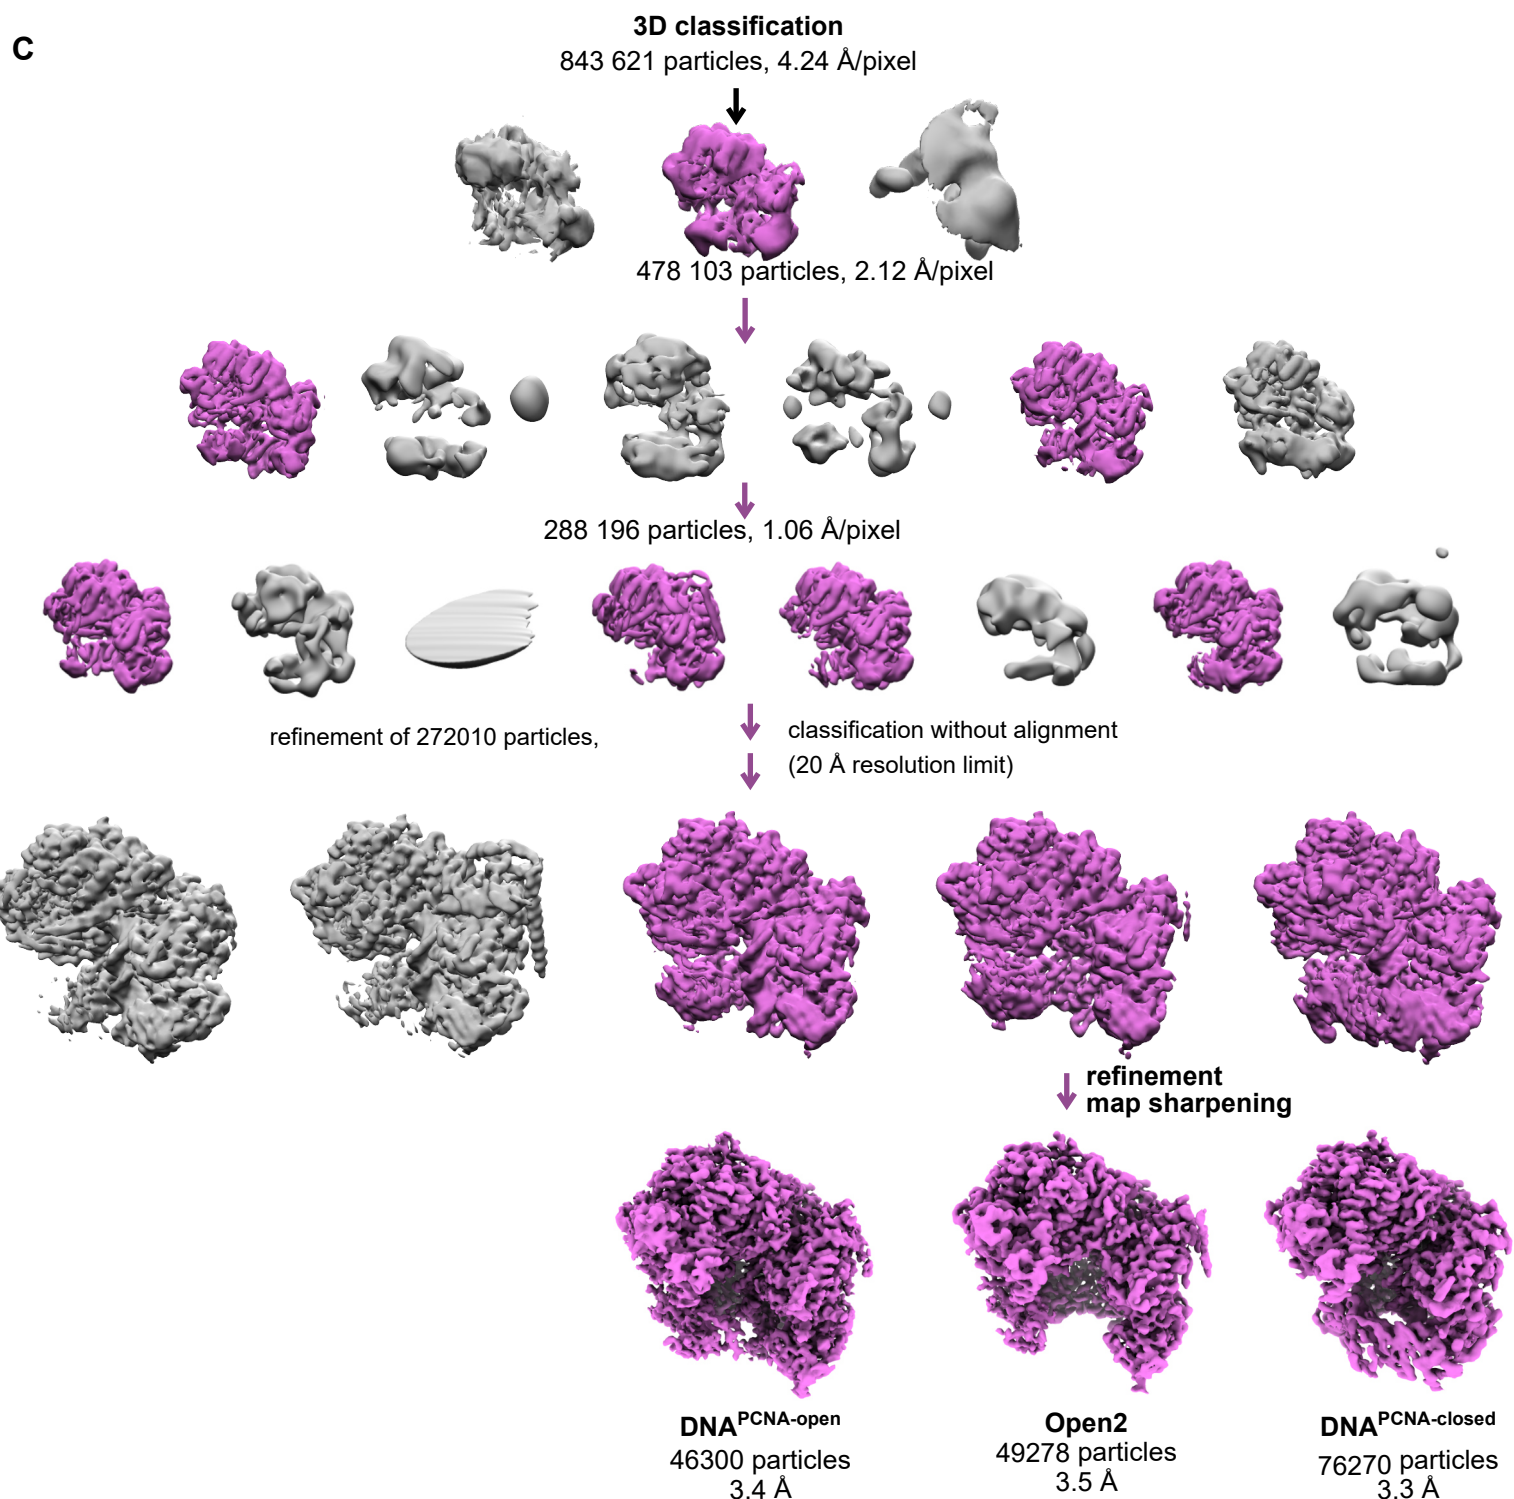

Supplement: supp [file elife_poa_e74175_Figure_1_figure_supplement_3.pdf › elife_poa_e74175_Figure_1_figure_supplement_3.pdf]

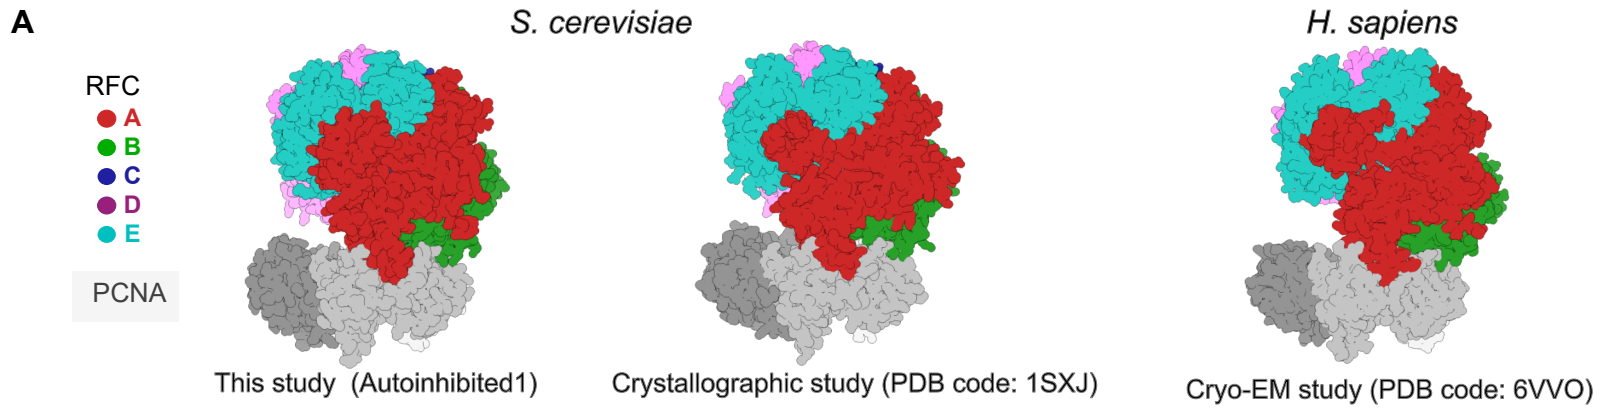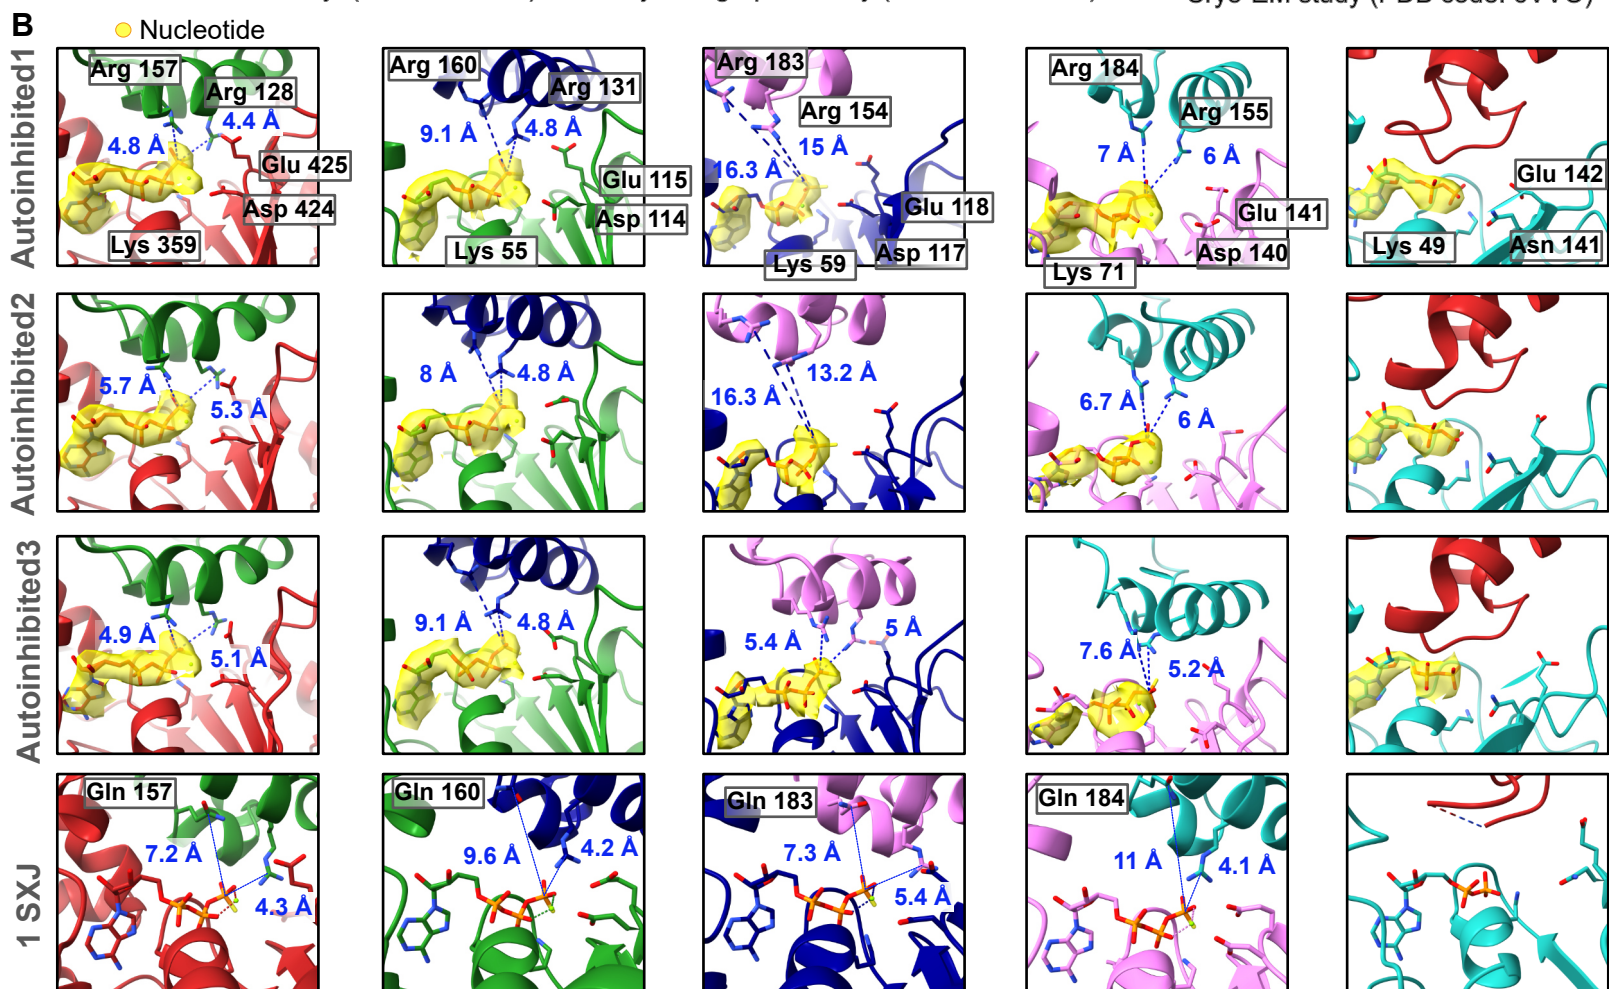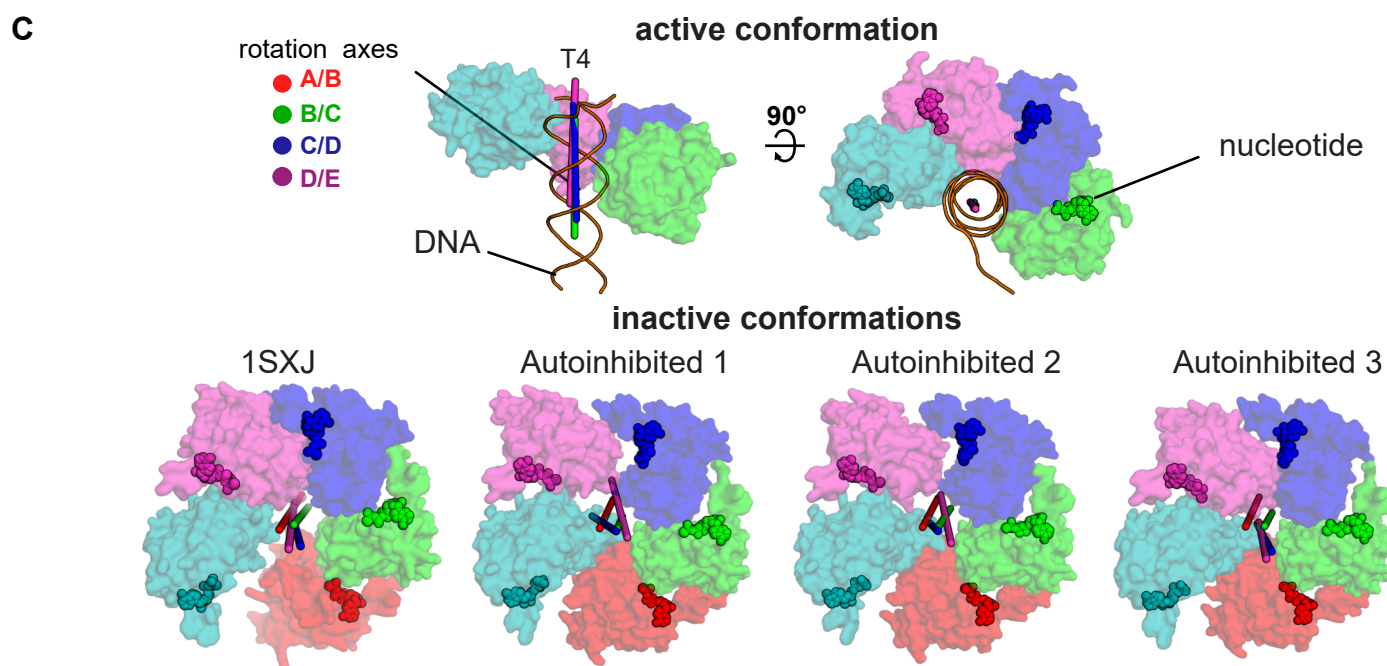

Supplement: supp [file elife_poa_e74175_Figure_2_figure_supplement_1.pdf › elife_poa_e74175_Figure_2_figure_supplement_1.pdf]

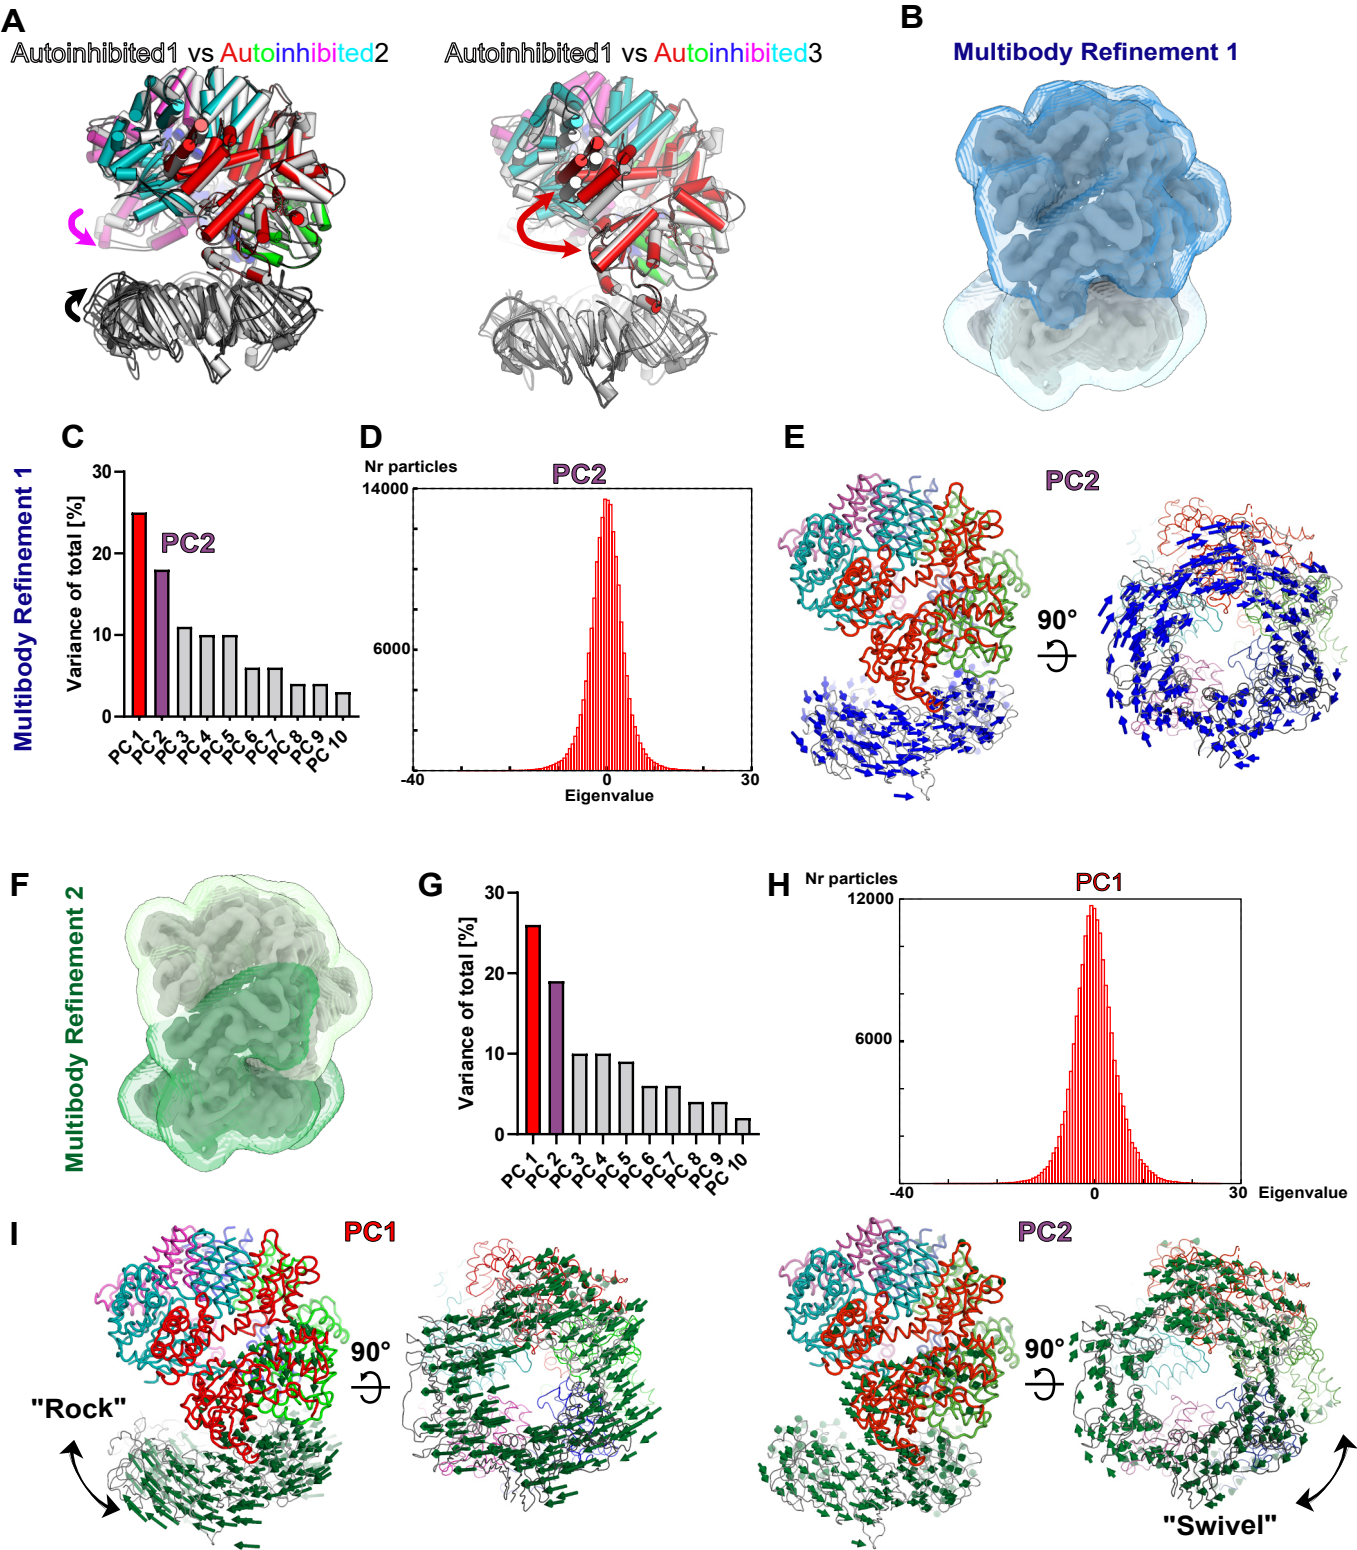

Supplement: supp [file elife_poa_e74175_Figure_2_figure_supplement_2.pdf › elife_poa_e74175_Figure_2_figure_supplement_2.pdf]

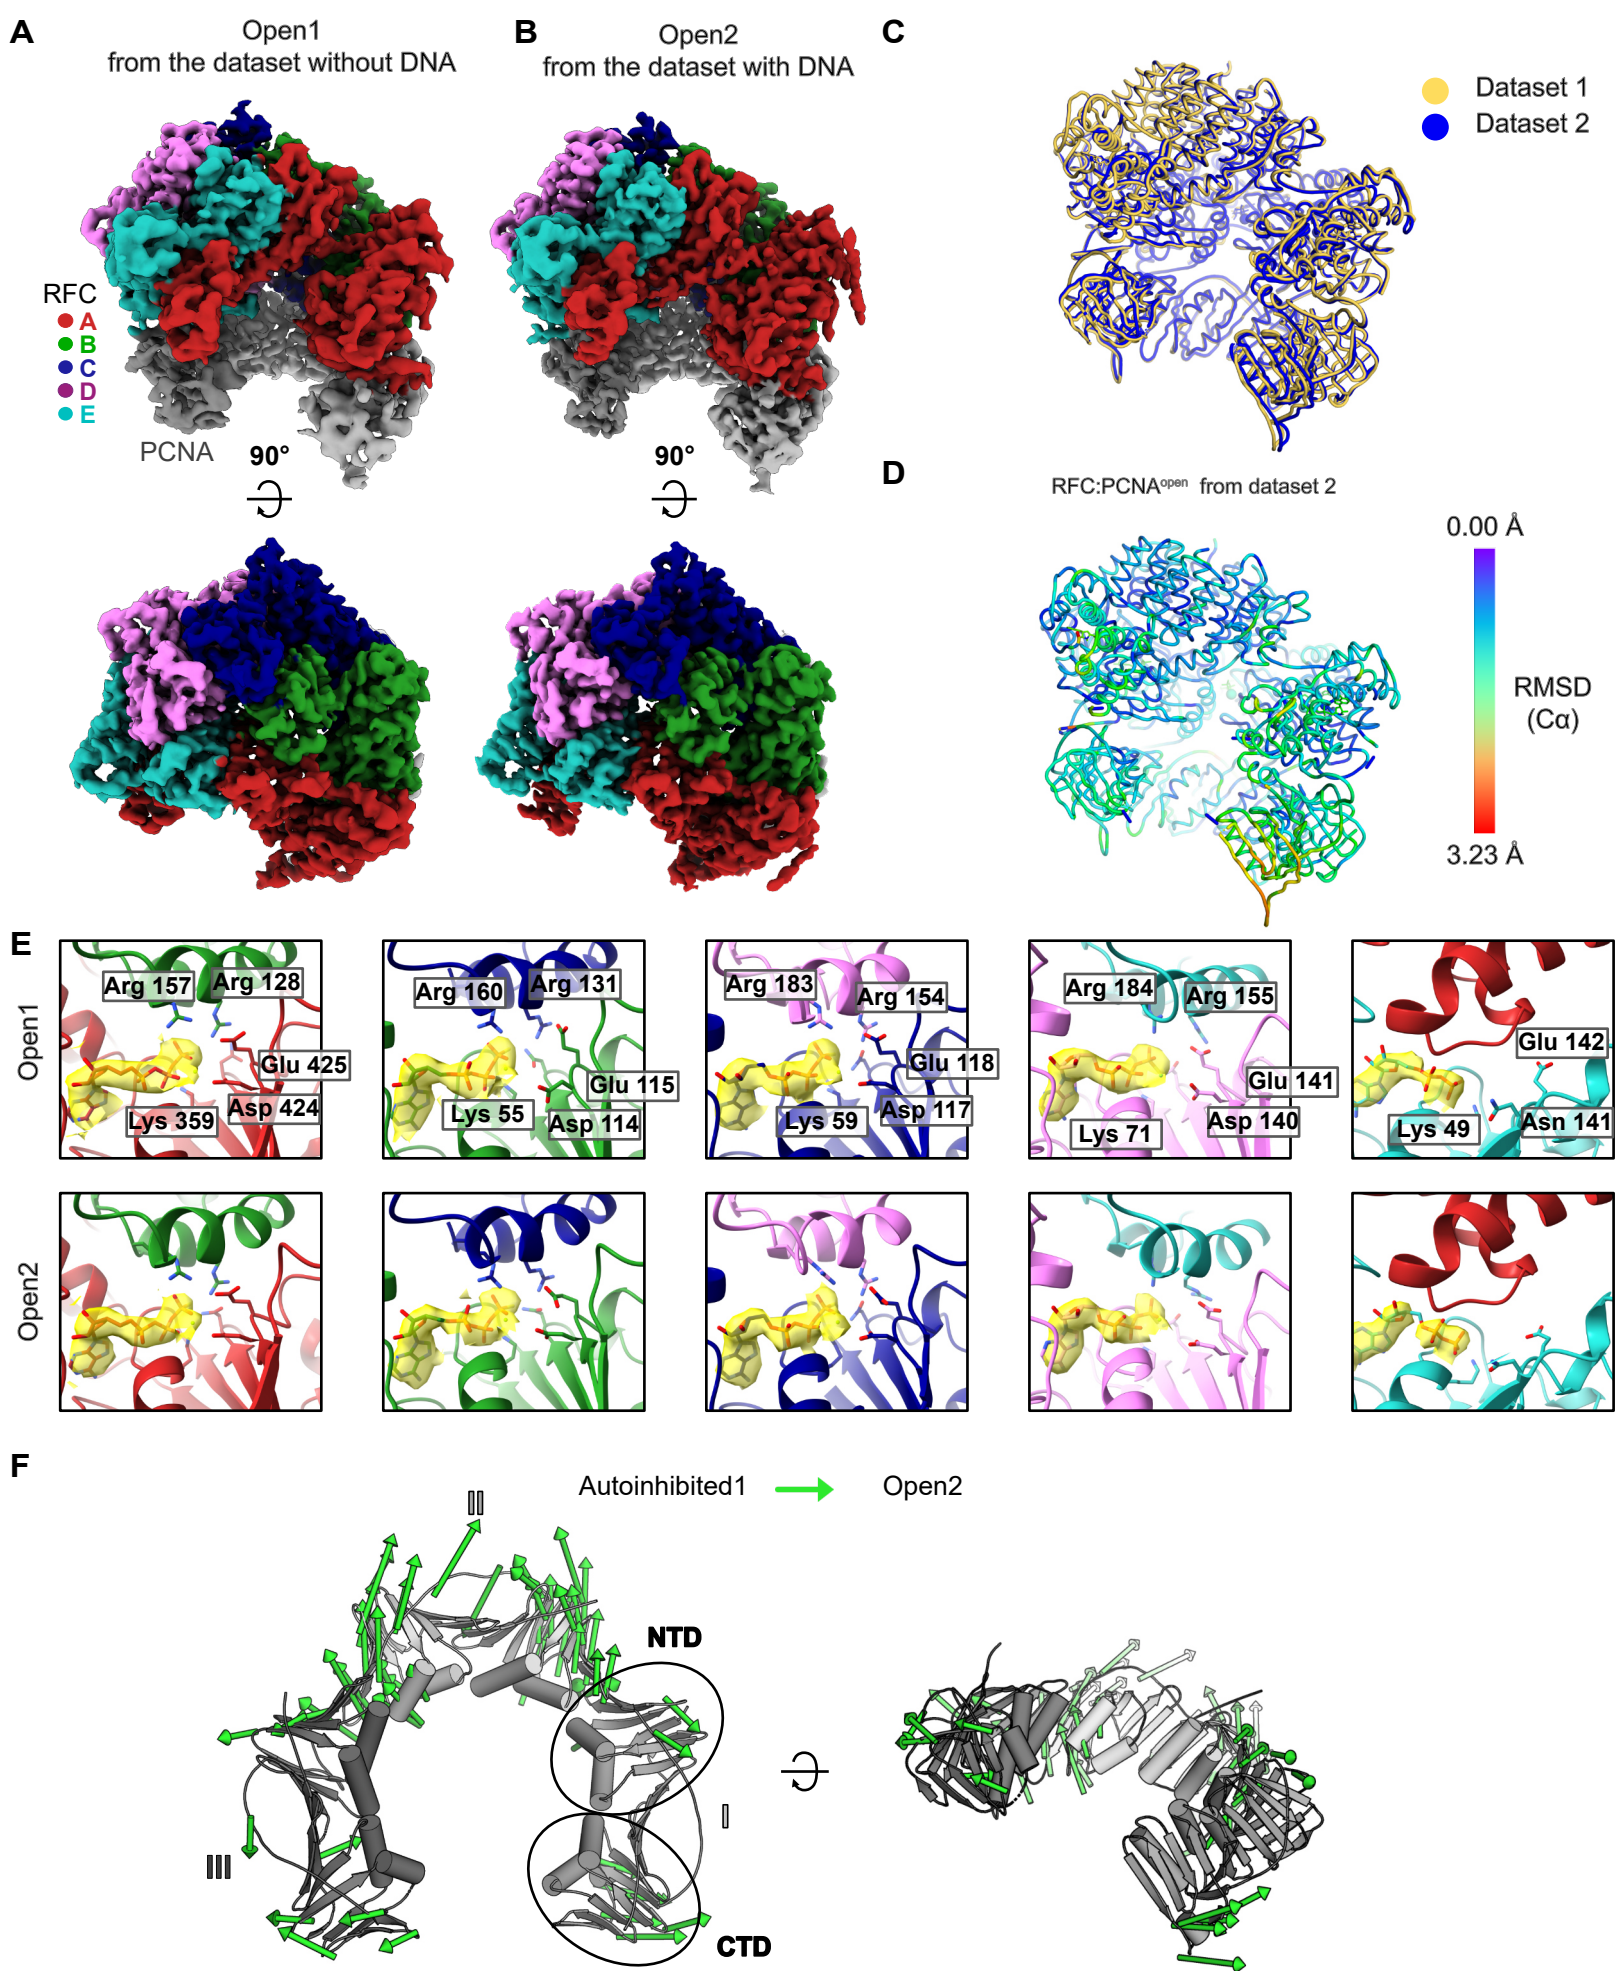

Supplement: supp [file elife_poa_e74175_Figure_3_figure_supplement_1.pdf › elife_poa_e74175_Figure_3_figure_supplement_1.pdf]

**A**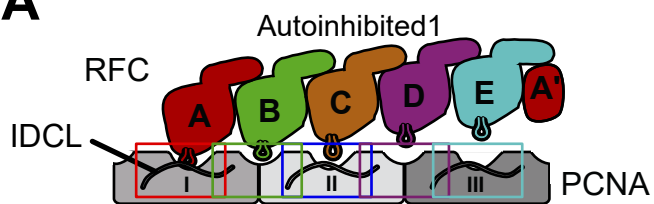**B**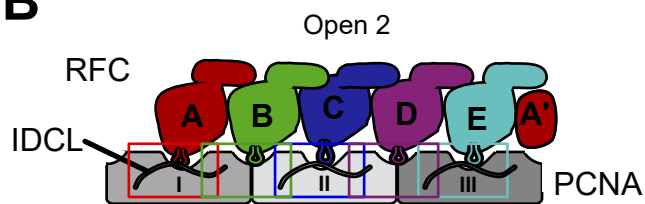**C**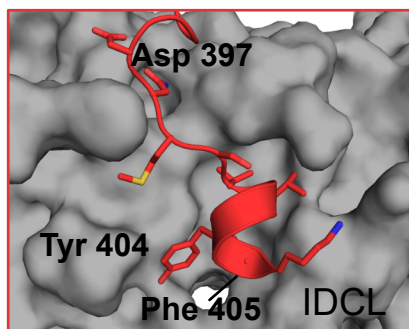

**RFC-A PIP motif**

RFC-A 397 DNMSVVG YF 405

Consensus xQxxΨxxΩΩ

Ψ=M, I, L, V

Ω=F, Y

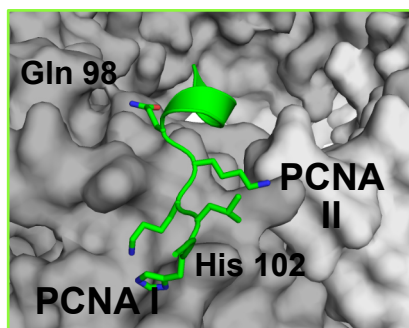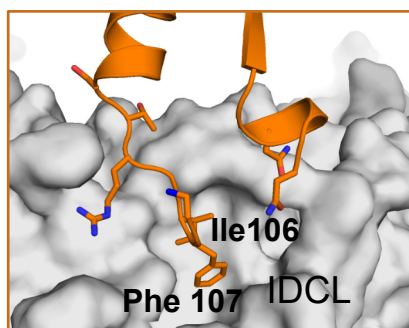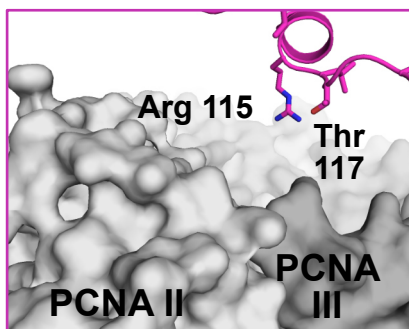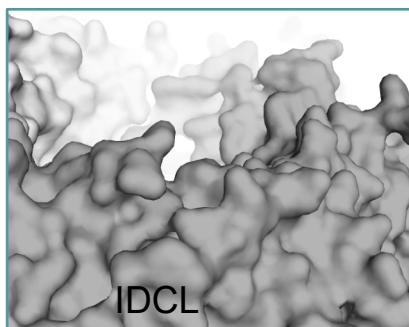**D**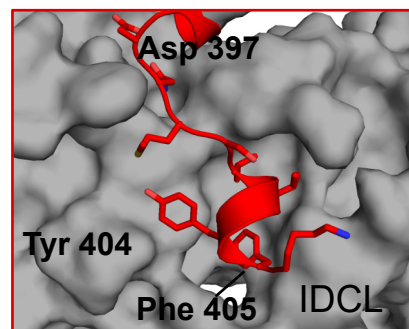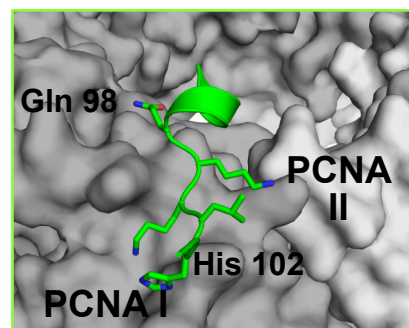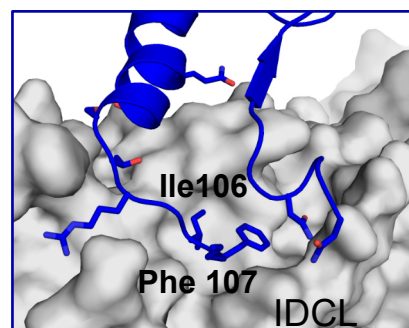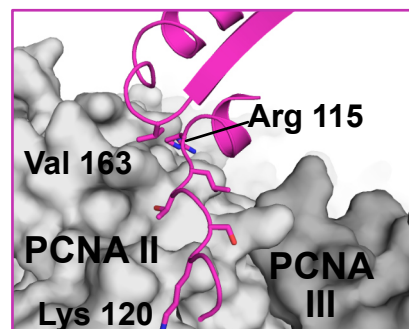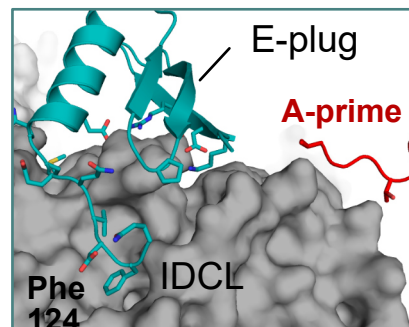

Supplement: supp [file elife_poa_e74175_Figure_3_figure_supplement_2.pdf › elife_poa_e74175_Figure_3_figure_supplement_2.pdf]

**A**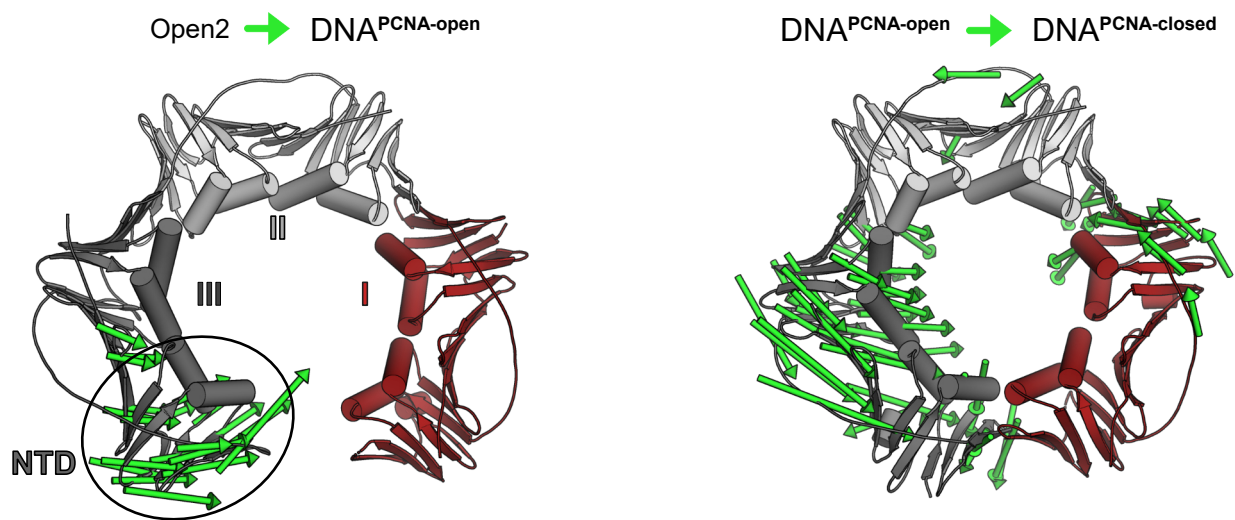**B**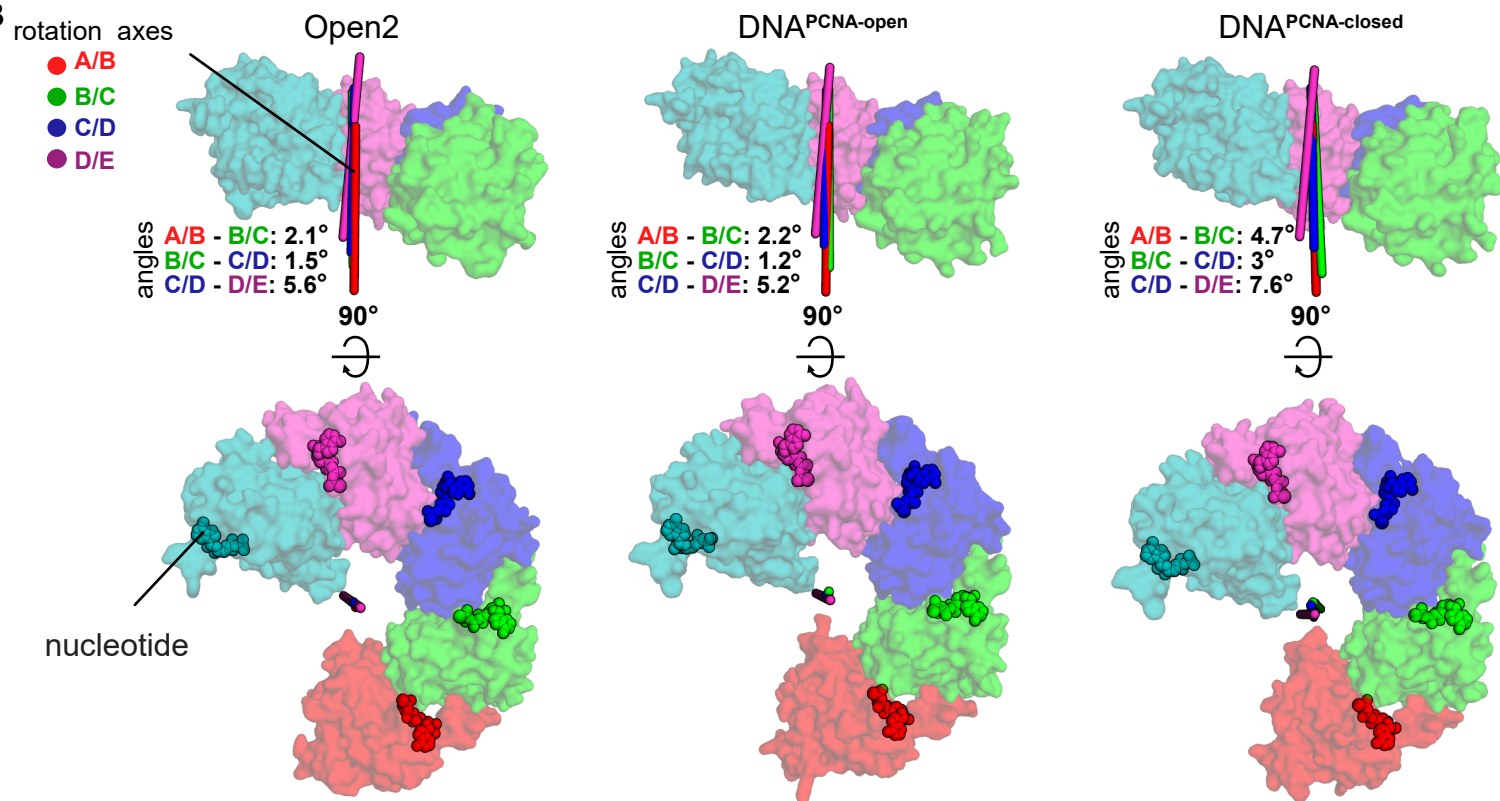**C**

● Nucleotide

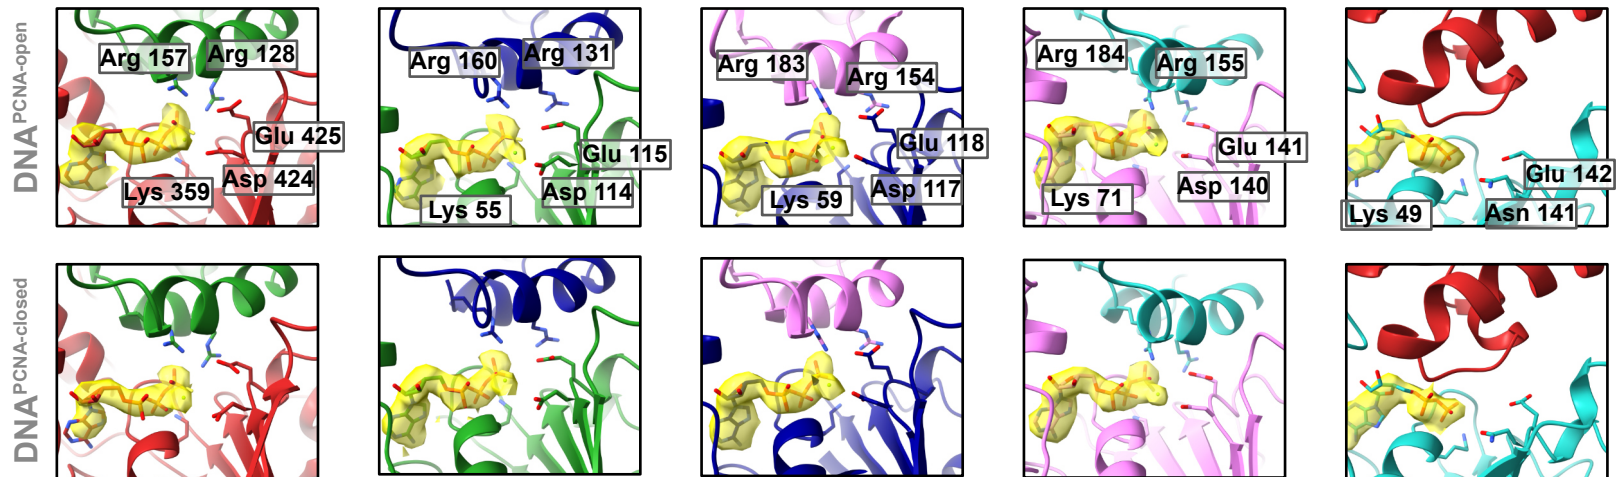

Supplement: supp [file elife_poa_e74175_Figure_5_figure_supplement_1.pdf › elife_poa_e74175_Figure_5_figure_supplement_1.pdf]

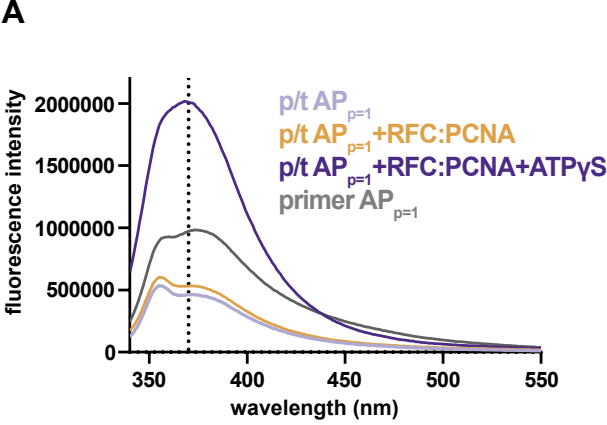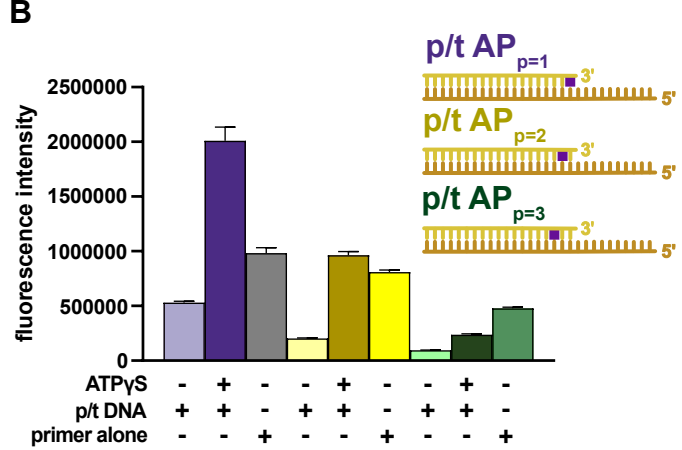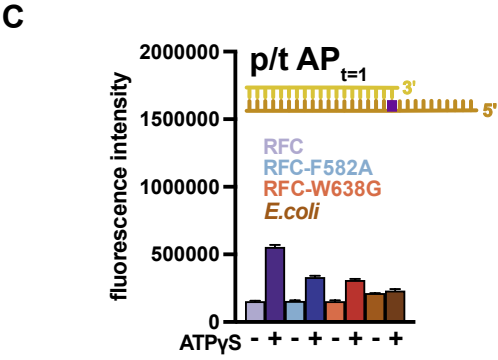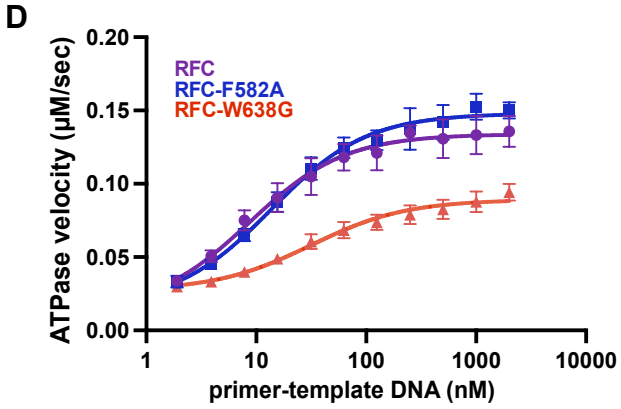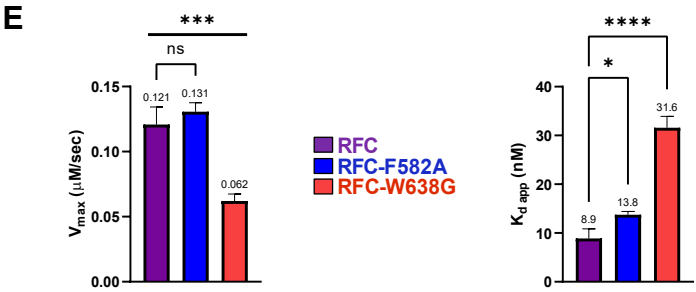

|       | V <sub>max</sub> (μM/s) | K <sub>d app</sub> (nM) |
|-------|-------------------------|-------------------------|
| WT    | 0.121±0.014             | 8.9±2.0                 |
| F582A | 0.131±0.007             | 13.8±0.7                |
| W638G | 0.062±0.005             | 31.6±2.4                |

Supplement: supp [file elife_poa_e74175_Figure_6_figure_supplement_1.pdf › elife_poa_e74175_Figure_6_figure_supplement_1.pdf]

**A**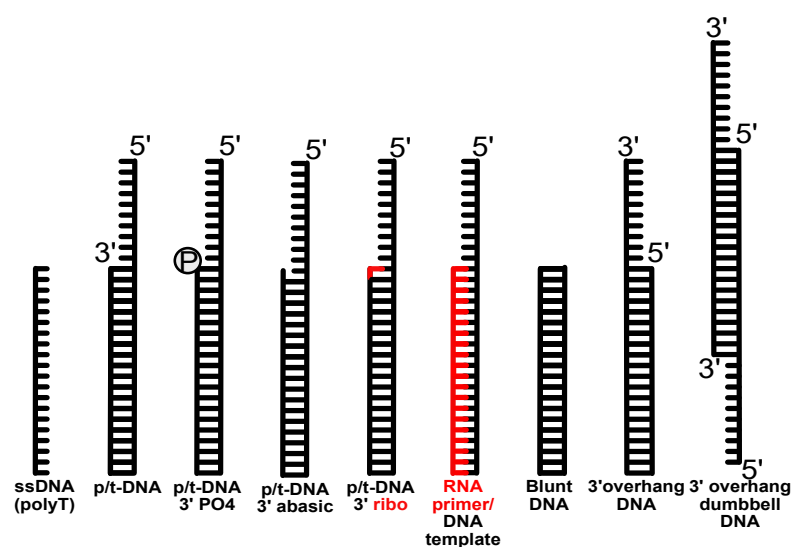**B**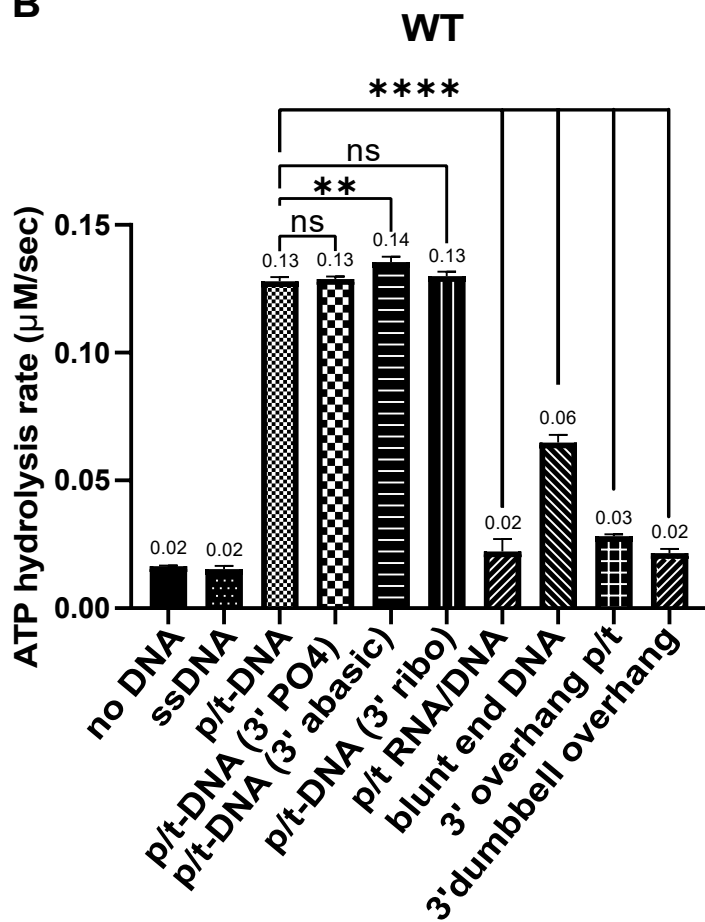**C**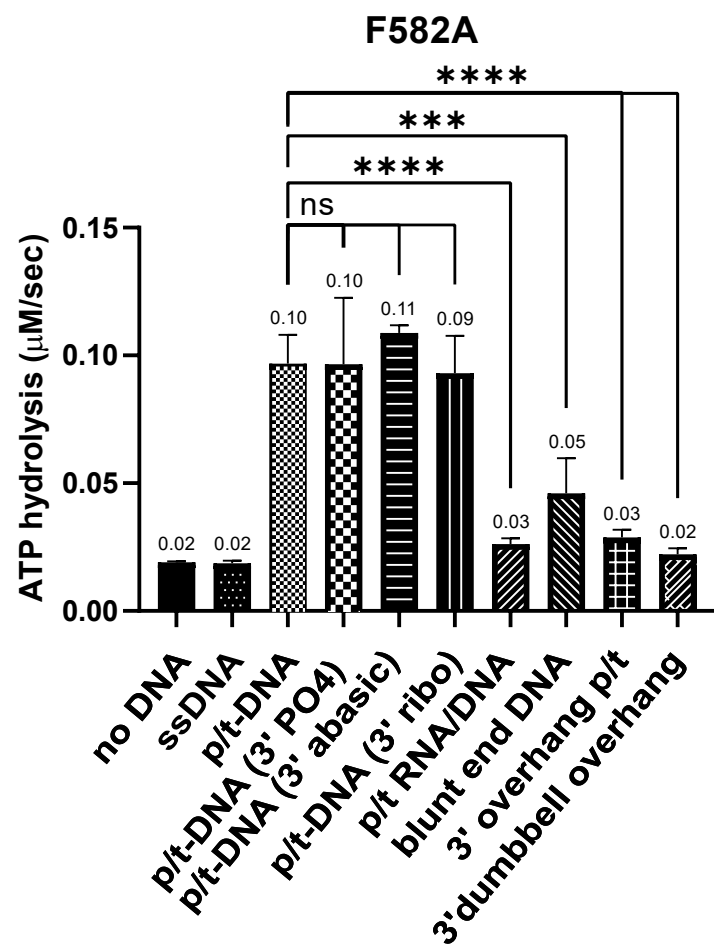**D**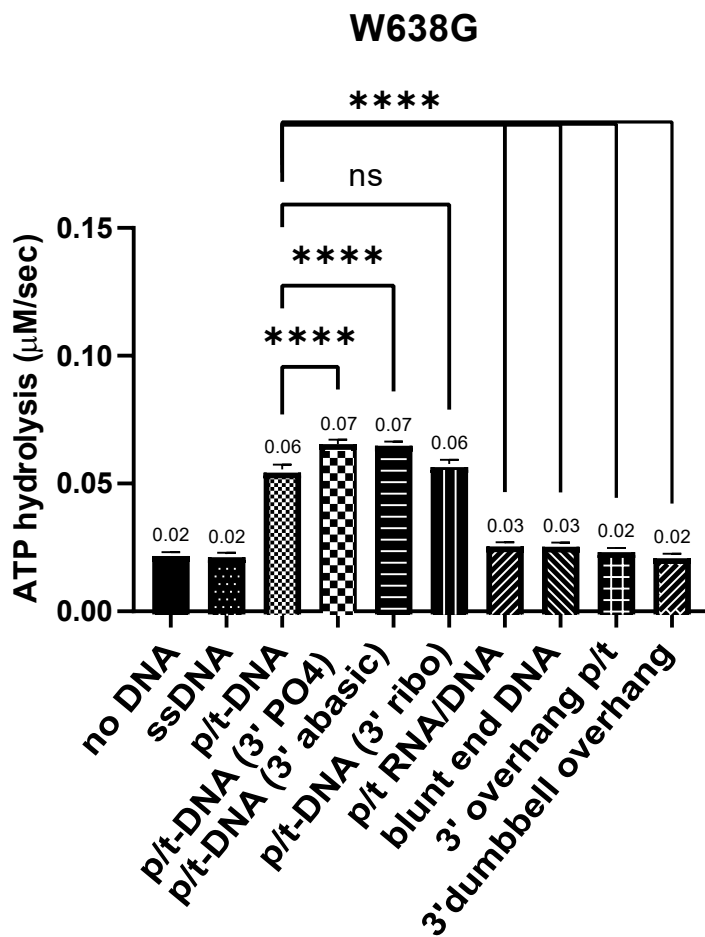

Supplement: supp [file elife_poa_e74175_Figure_6_figure_supplement_2.pdf › elife_poa_e74175_Figure_6_figure_supplement_2.pdf]

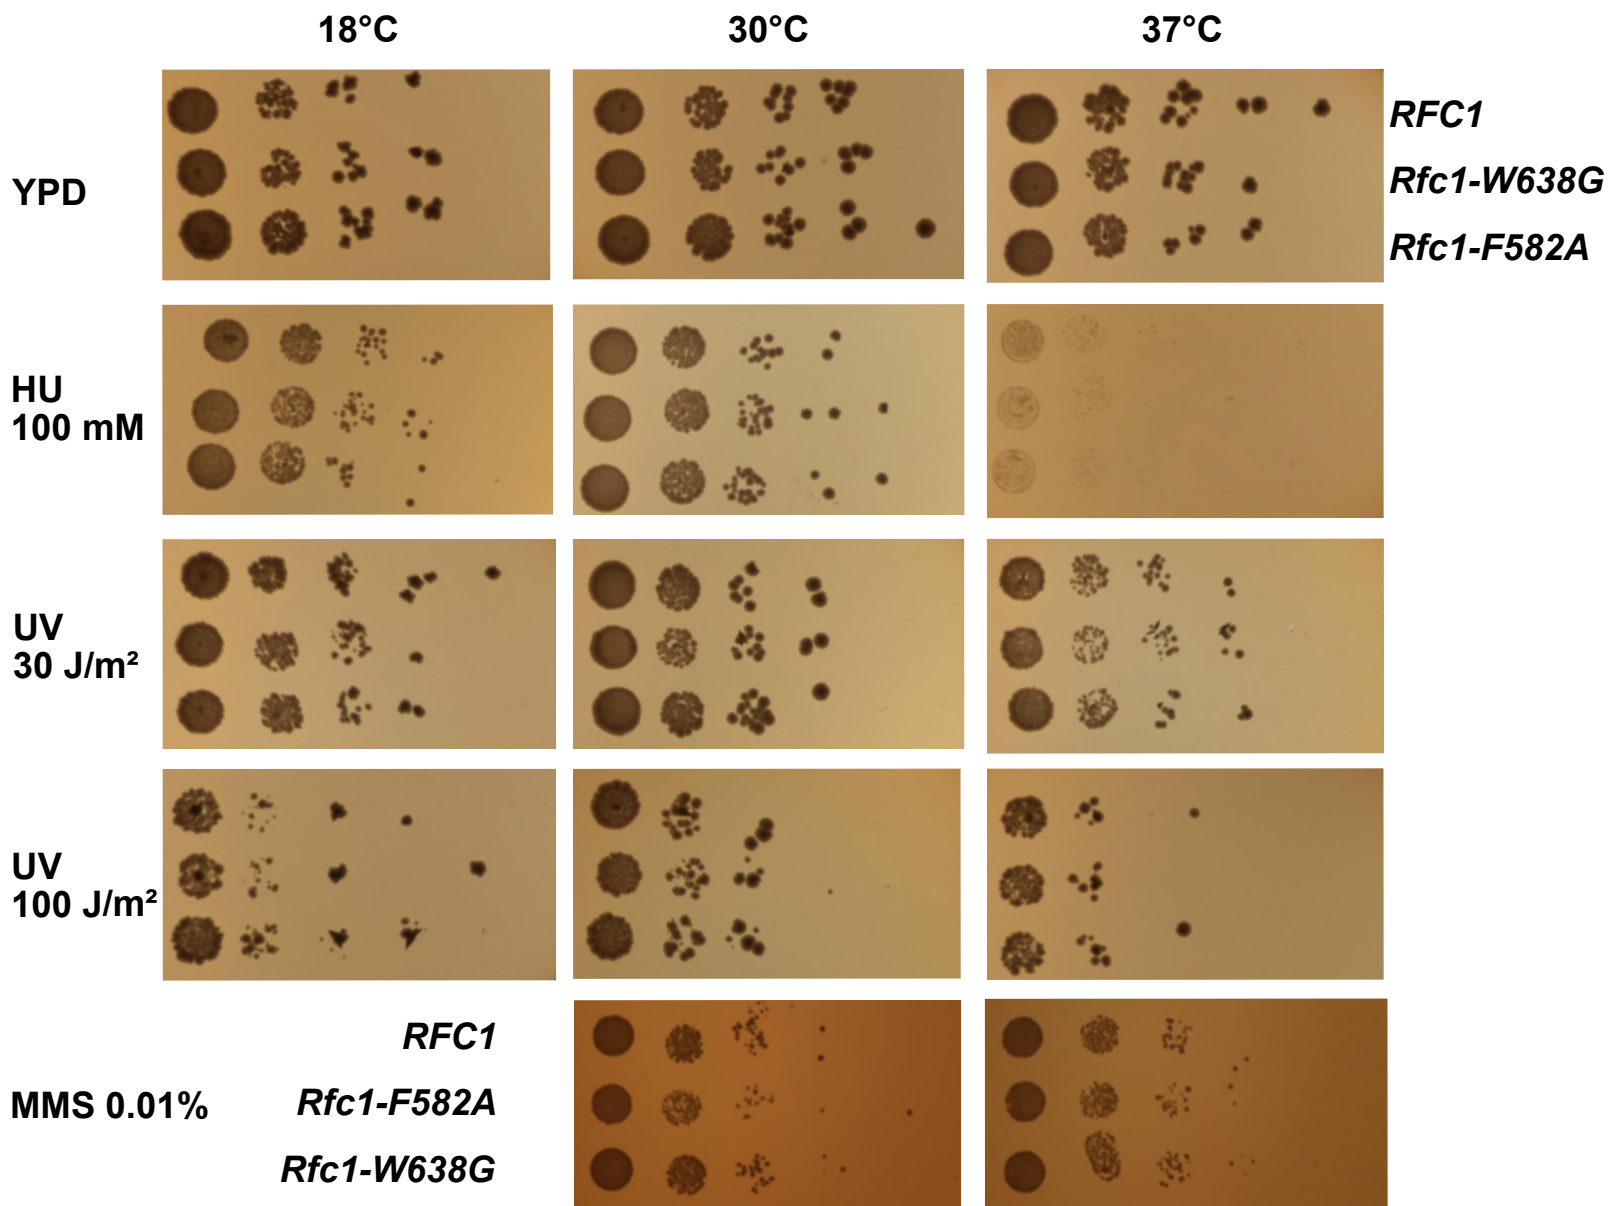

Supplement: supp [file elife_poa_e74175_Figure_6_figure_supplement_3.pdf › elife_poa_e74175_Figure_6_figure_supplement_3.pdf]
